# Supplementary material for: Optimized bio-fertilization drives the synergistic recovery of vegetation productivity and soil multifunctionality by reshaping fungal interaction patterns in degraded alpine mines
Source: Research Square preprint supplement (doi:10.21203/rs.3.rs-8837993/v1), 2026-02-20
Supplement: Supplementary file 1 [file aa90fcfbac60514ee7309541.docx]

**Table S1.** Vegetation characteristics (height, coverage, density, and aboveground biomass) under different combined treatment regimes.

| Year | Treatment | Vegetation height/cm | Vegetation coverage/% | Vegetation density/(plants·m-2) | Aboveground biomass/(g·m-2) |
| --- | --- | --- | --- | --- | --- |
|  | CK | 16.53±0.93 d | 58.81±1.42 d | 345.33±8.35 c | 198.33±8.19 c |
|  | W1J1 | 21.11±0.70 c | 63.47±0.98 c | 385.67±7.36 b | 223.33±8.17 c |
|  | W1J2 | 26.31±1.10 b | 64.98±1.45 c | 408.67±8.65 ab | 266.33±12.17 b |
|  | W1J3 | 34.29±0.63 a | 75.32±2.54 a | 424.00±11.33 a | 325.00±21.08 a |
| 2023 | W2J1 | 31.51±2.25 a | 69.67±1.47 b | 413.67±10.99 a | 315.33±11.05 a |
|  | W2J2 | 32.03±1.45 a | 71.02±1.63 ab | 420.67±5.24 a | 322.33±12.86 a |
|  | W2J3 | 32.74±1.40 a | 72.51±1.94 ab | 414.00±4.04 a | 339.67±9.61 a |
|  | W3J1 | 34.92±1.68 a | 74.31±0.61 a | 428.00±9.07 a | 342.67±11.89 a |
|  | W3J2 | 31.68±0.78 a | 72.49±1.77 ab | 411.33±5.84 a | 331.33±3.76 a |
|  | W3J3 | 31.72±0.90 a | 71.14±0.92 ab | 406.33±13.38 a | 326.67±11.92 a |
|  | CK | 17.86±1.06 e | 59.14±0.96 d | 342.67±10.48 c | 195.67±4.84 f |
|  | W1J1 | 22.71±0.75 d | 65.13±1.64 c | 389.00±4.04 b | 233.33±1.86 e |
|  | W1J2 | 26.64±1.15 c | 68.98±0.89 bc | 422.00±17.62 a | 273.00±6.08 d |
|  | W1J3 | 35.16±0.46 ab | 76.98±0.91a | 440.33±5.33 a | 351.33±7.22 a |
| 2024 | W2J1 | 32.18±1.64 b | 73.33±2.03 ab | 437.00±14.36 a | 321.00±5.77 c |
|  | W2J2 | 33.70±0.67 ab | 72.72±2.30 ab | 434.00±12.5 a | 329.00±10.69 bc |
|  | W2J3 | 34.07±1.84 ab | 73.84±1.57 a | 424.00±8.14 a | 339.67±3.53 abc |
|  | W3J1 | 35.87±1.78 a | 77.31±1.13 a | 434.67±3.67 a | 352.67±4.98 a |
|  | W3J2 | 33.01±0.55 ab | 73.49±2.65 ab | 421.33±8.99 a | 344.67±10.37 ab |
|  | W3J3 | 32.72±0.61 ab | 72.47±1.27 ab | 409.67±13.38 a | 323.33±7.22 c |

**Note:** W represents the application level of forage-specific fertilizer (W1: 225.00 kg·hm⁻²; W2: 300.00 kg·hm⁻²; W3: 375.00 kg·hm⁻²); J represents the application level of composite microbial inoculant (J1: 350.00 kg·hm⁻²; J2: 500.00 kg·hm⁻²; J3: 650.00 kg·hm⁻²). Data are presented as mean ± standard deviation (n = 3). Lowercase letters (e.g., “a”, “b”) within each column indicate significant differences among treatments at the 0.05 probability level.

**Figure S1.** Relative abundance of soil fungal communities under different treatments. (a) Phylum level; (b) Genus level.

**Figure S2.** Linear Discriminant Analysis Effect Size (LEfSe) analysis identifying discriminant fungal taxa across different treatments.

**Figure S3.** Network analysis of soil fungal communities at the genus level, highlighting shifts in dominant hub taxa.

**Figure S4.** FUNGuild functional classification of soil fungal communities under different fertilization treatments.





**Figure S1.** Relative abundance of soil fungal communities under different treatments. (a) Phylum level; (b) Genus level.

**Note:** W represents forage-specific fertilizer level (W1: 225.00 kg·hm⁻²; W2: 300.00 kg·hm⁻²; W3: 375.00 kg·hm⁻²); J represents composite microbial inoculant level (J1: 350.00 kg·hm⁻²; J2: 500.00 kg·hm⁻²; J3: 650.00 kg·hm⁻²).


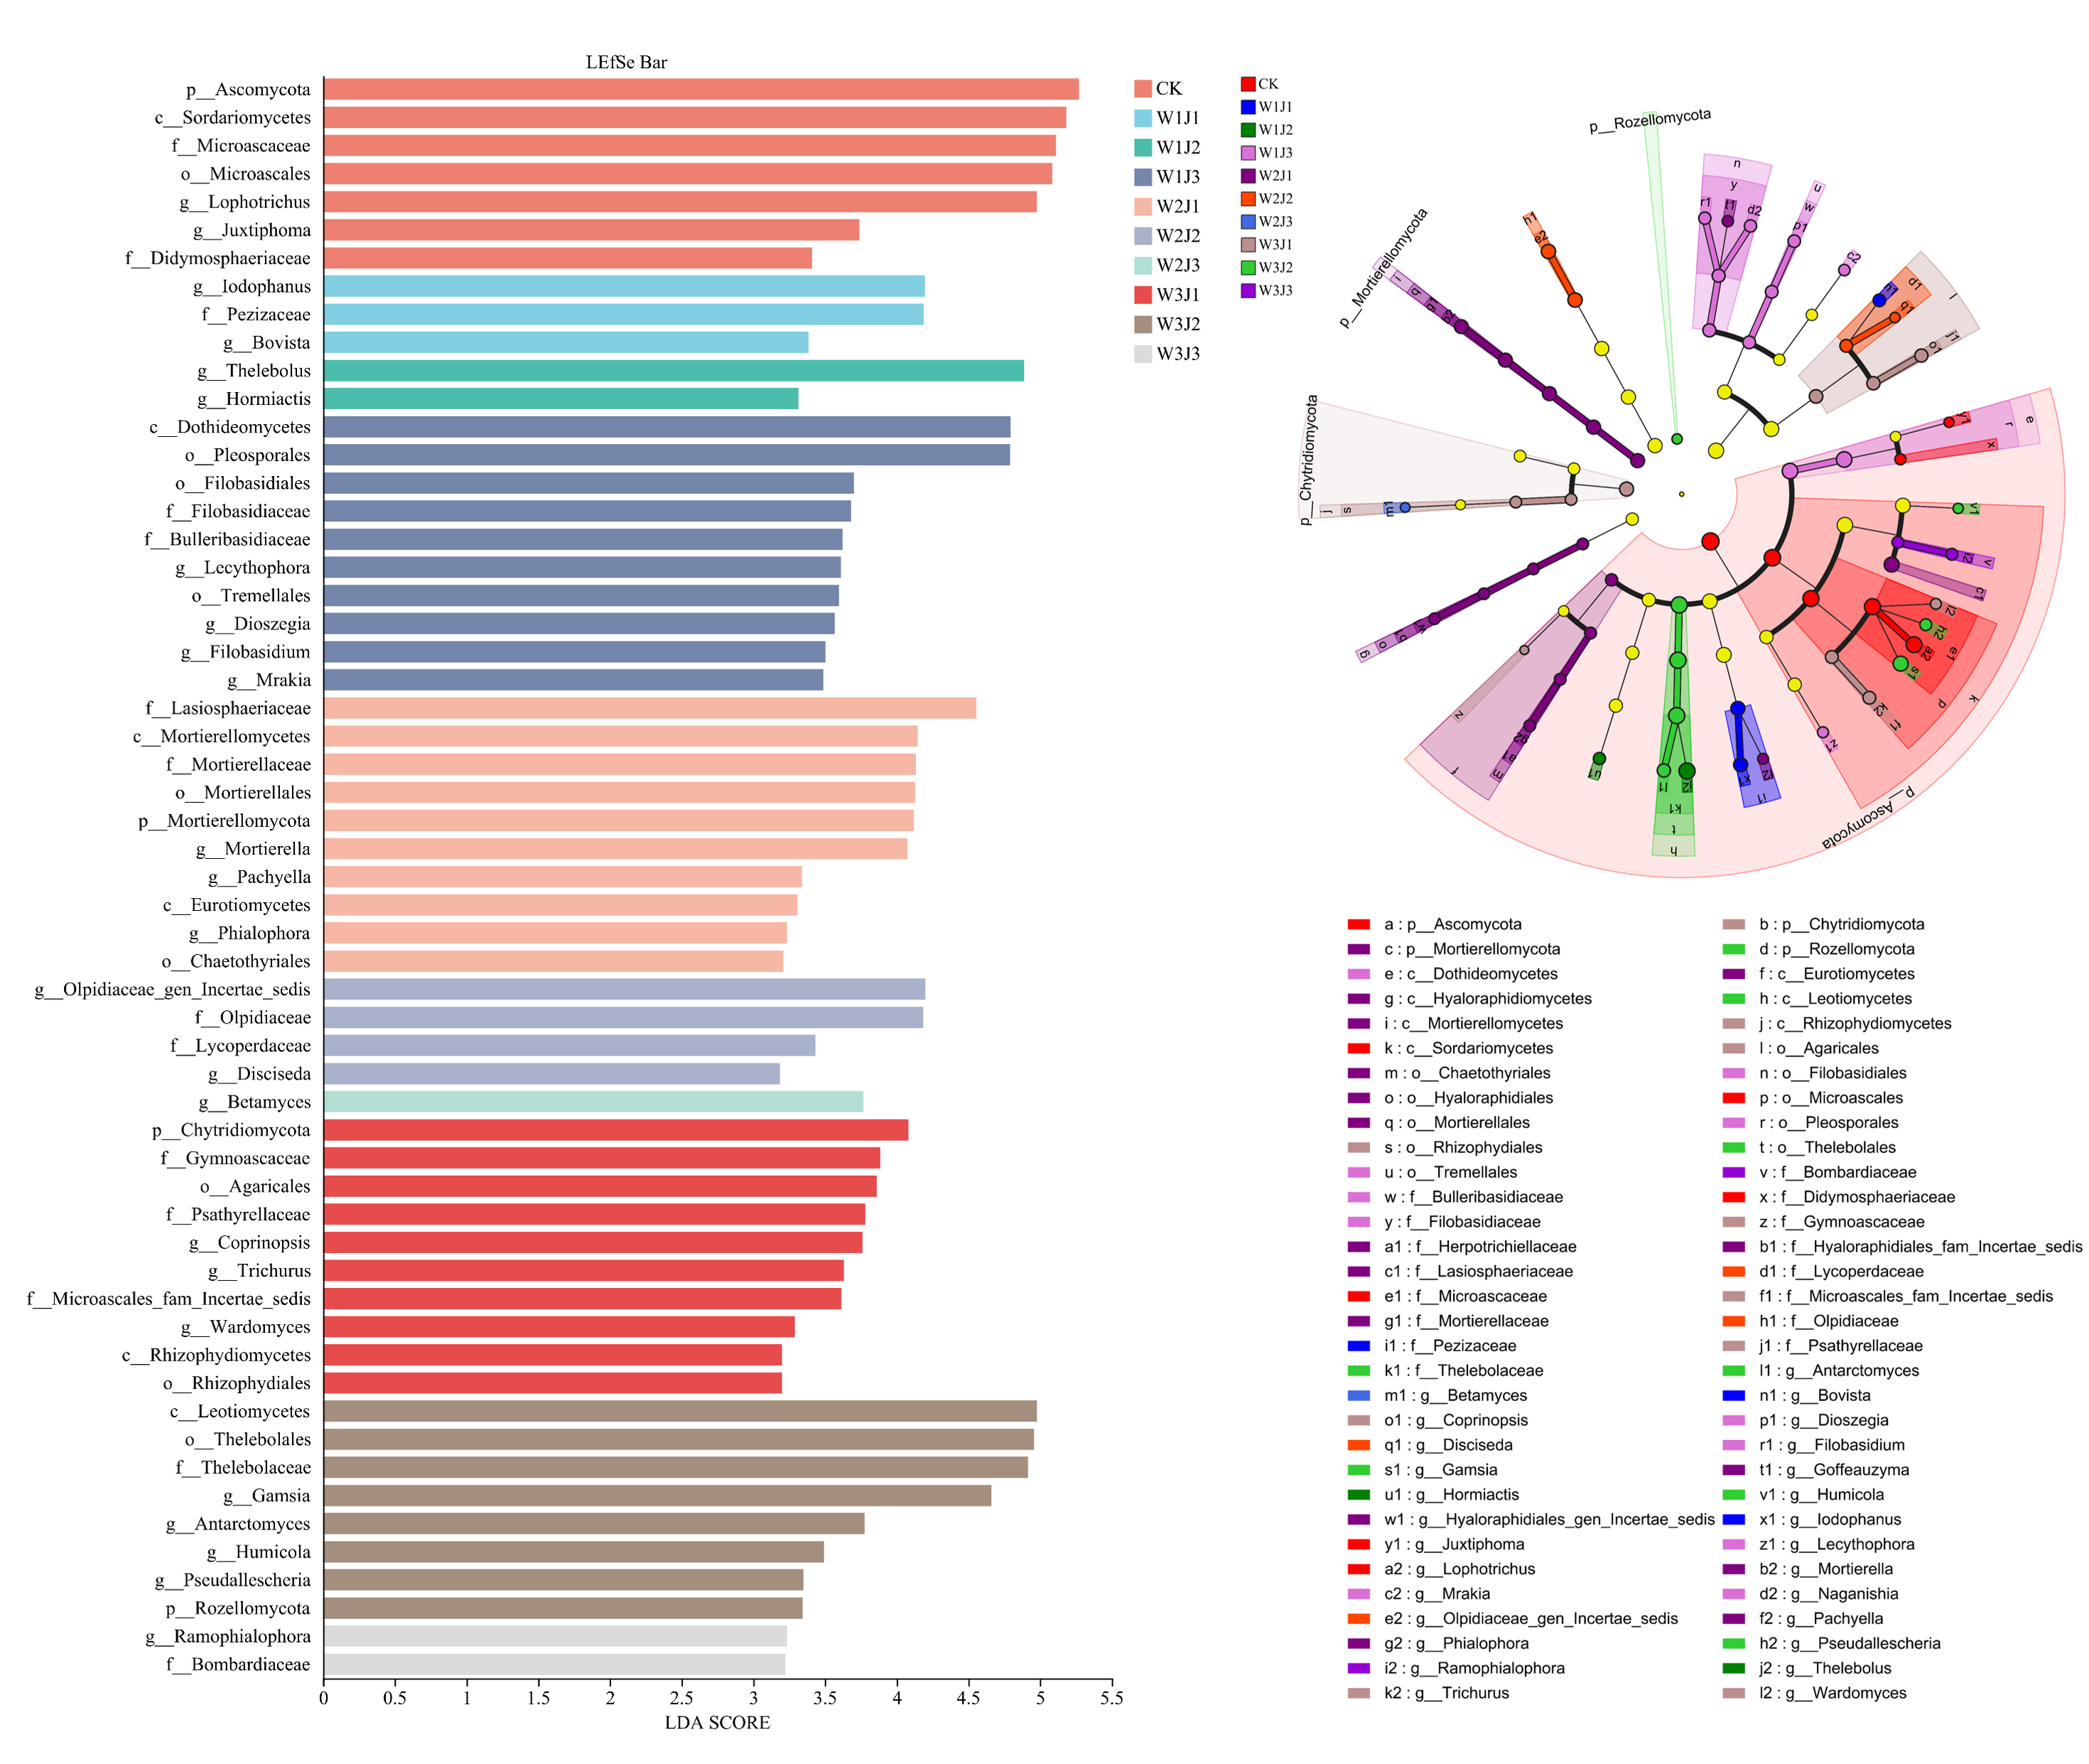


**Figure S2.** Linear Discriminant Analysis Effect Size (LEfSe) analysis identifying discriminant fungal taxa across different treatments.

**Note:** W represents forage-specific fertilizer level (W1: 225.00 kg·hm⁻²; W2: 300.00 kg·hm⁻²; W3: 375.00 kg·hm⁻²); J represents composite microbial inoculant level (J1: 350.00 kg·hm⁻²; J2: 500.00 kg·hm⁻²; J3: 650.00 kg·hm⁻²).


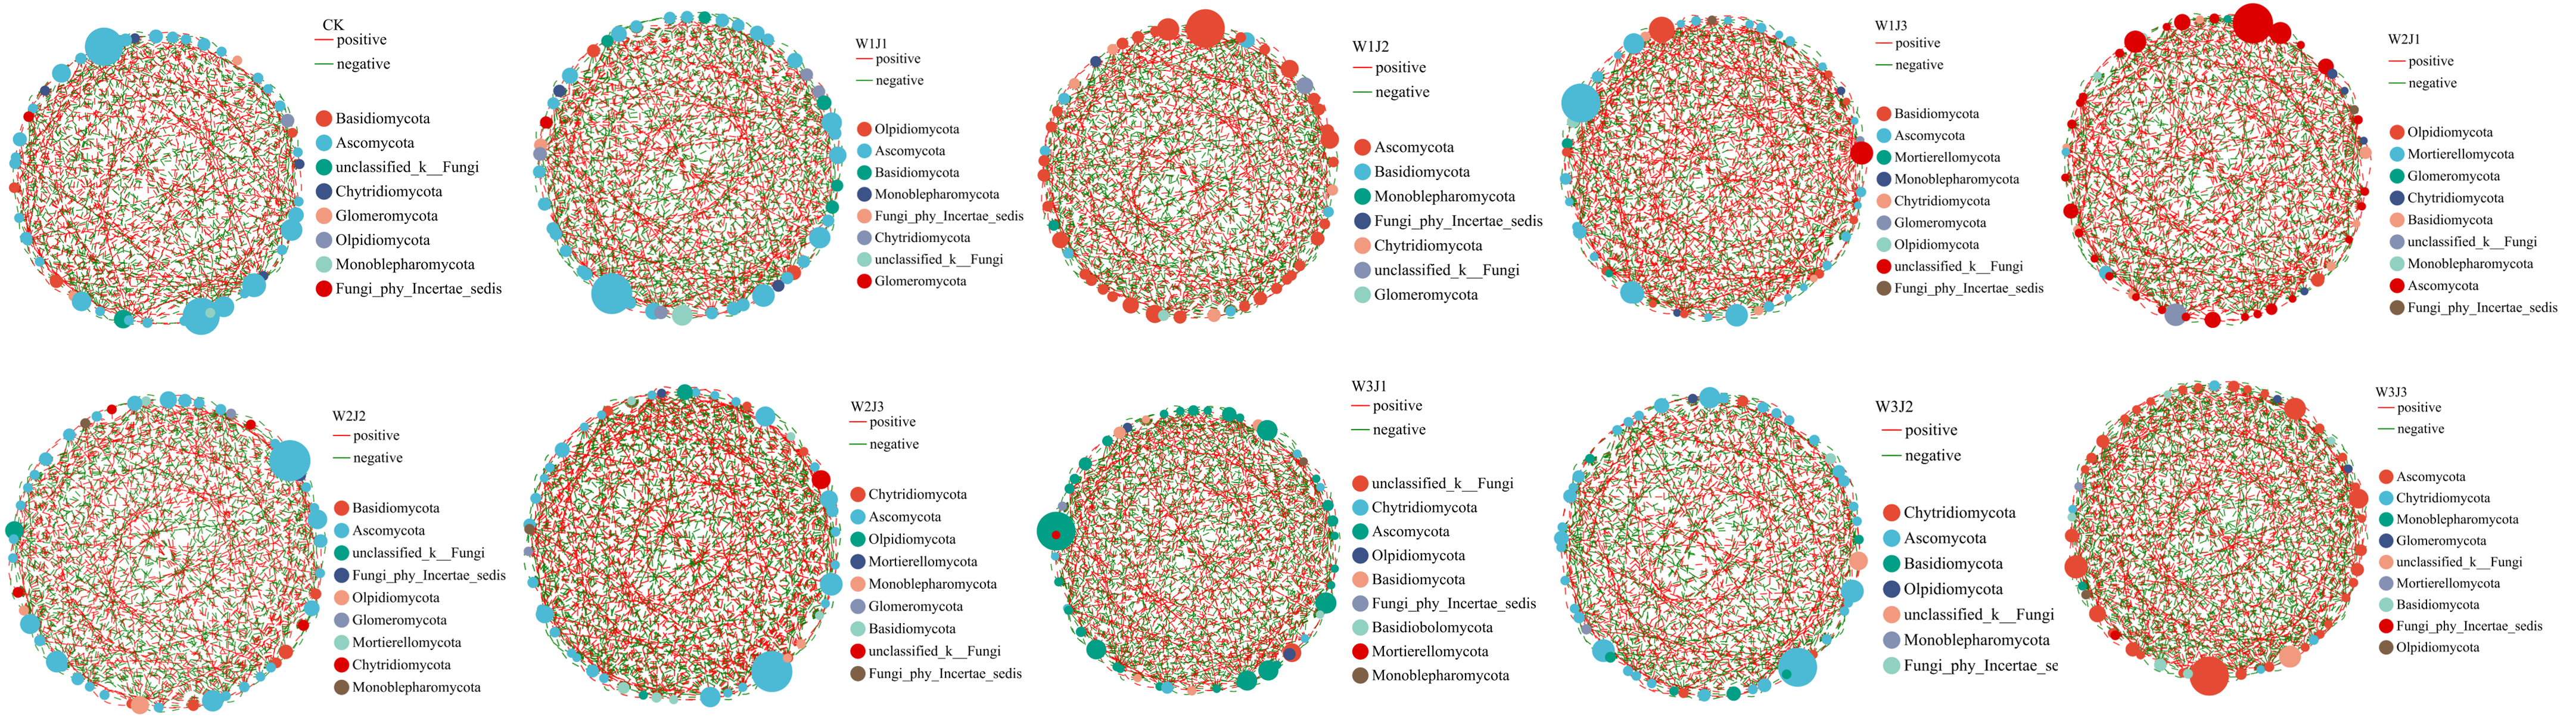


**Figure S3.** Network analysis of soil fungal communities at the genus level, highlighting shifts in dominant hub taxa.

**Note:** W represents forage-specific fertilizer level (W1: 225.00 kg·hm⁻²; W2: 300.00 kg·hm⁻²; W3: 375.00 kg·hm⁻²); J represents composite microbial inoculant level (J1: 350.00 kg·hm⁻²; J2: 500.00 kg·hm⁻²; J3: 650.00 kg·hm⁻²).


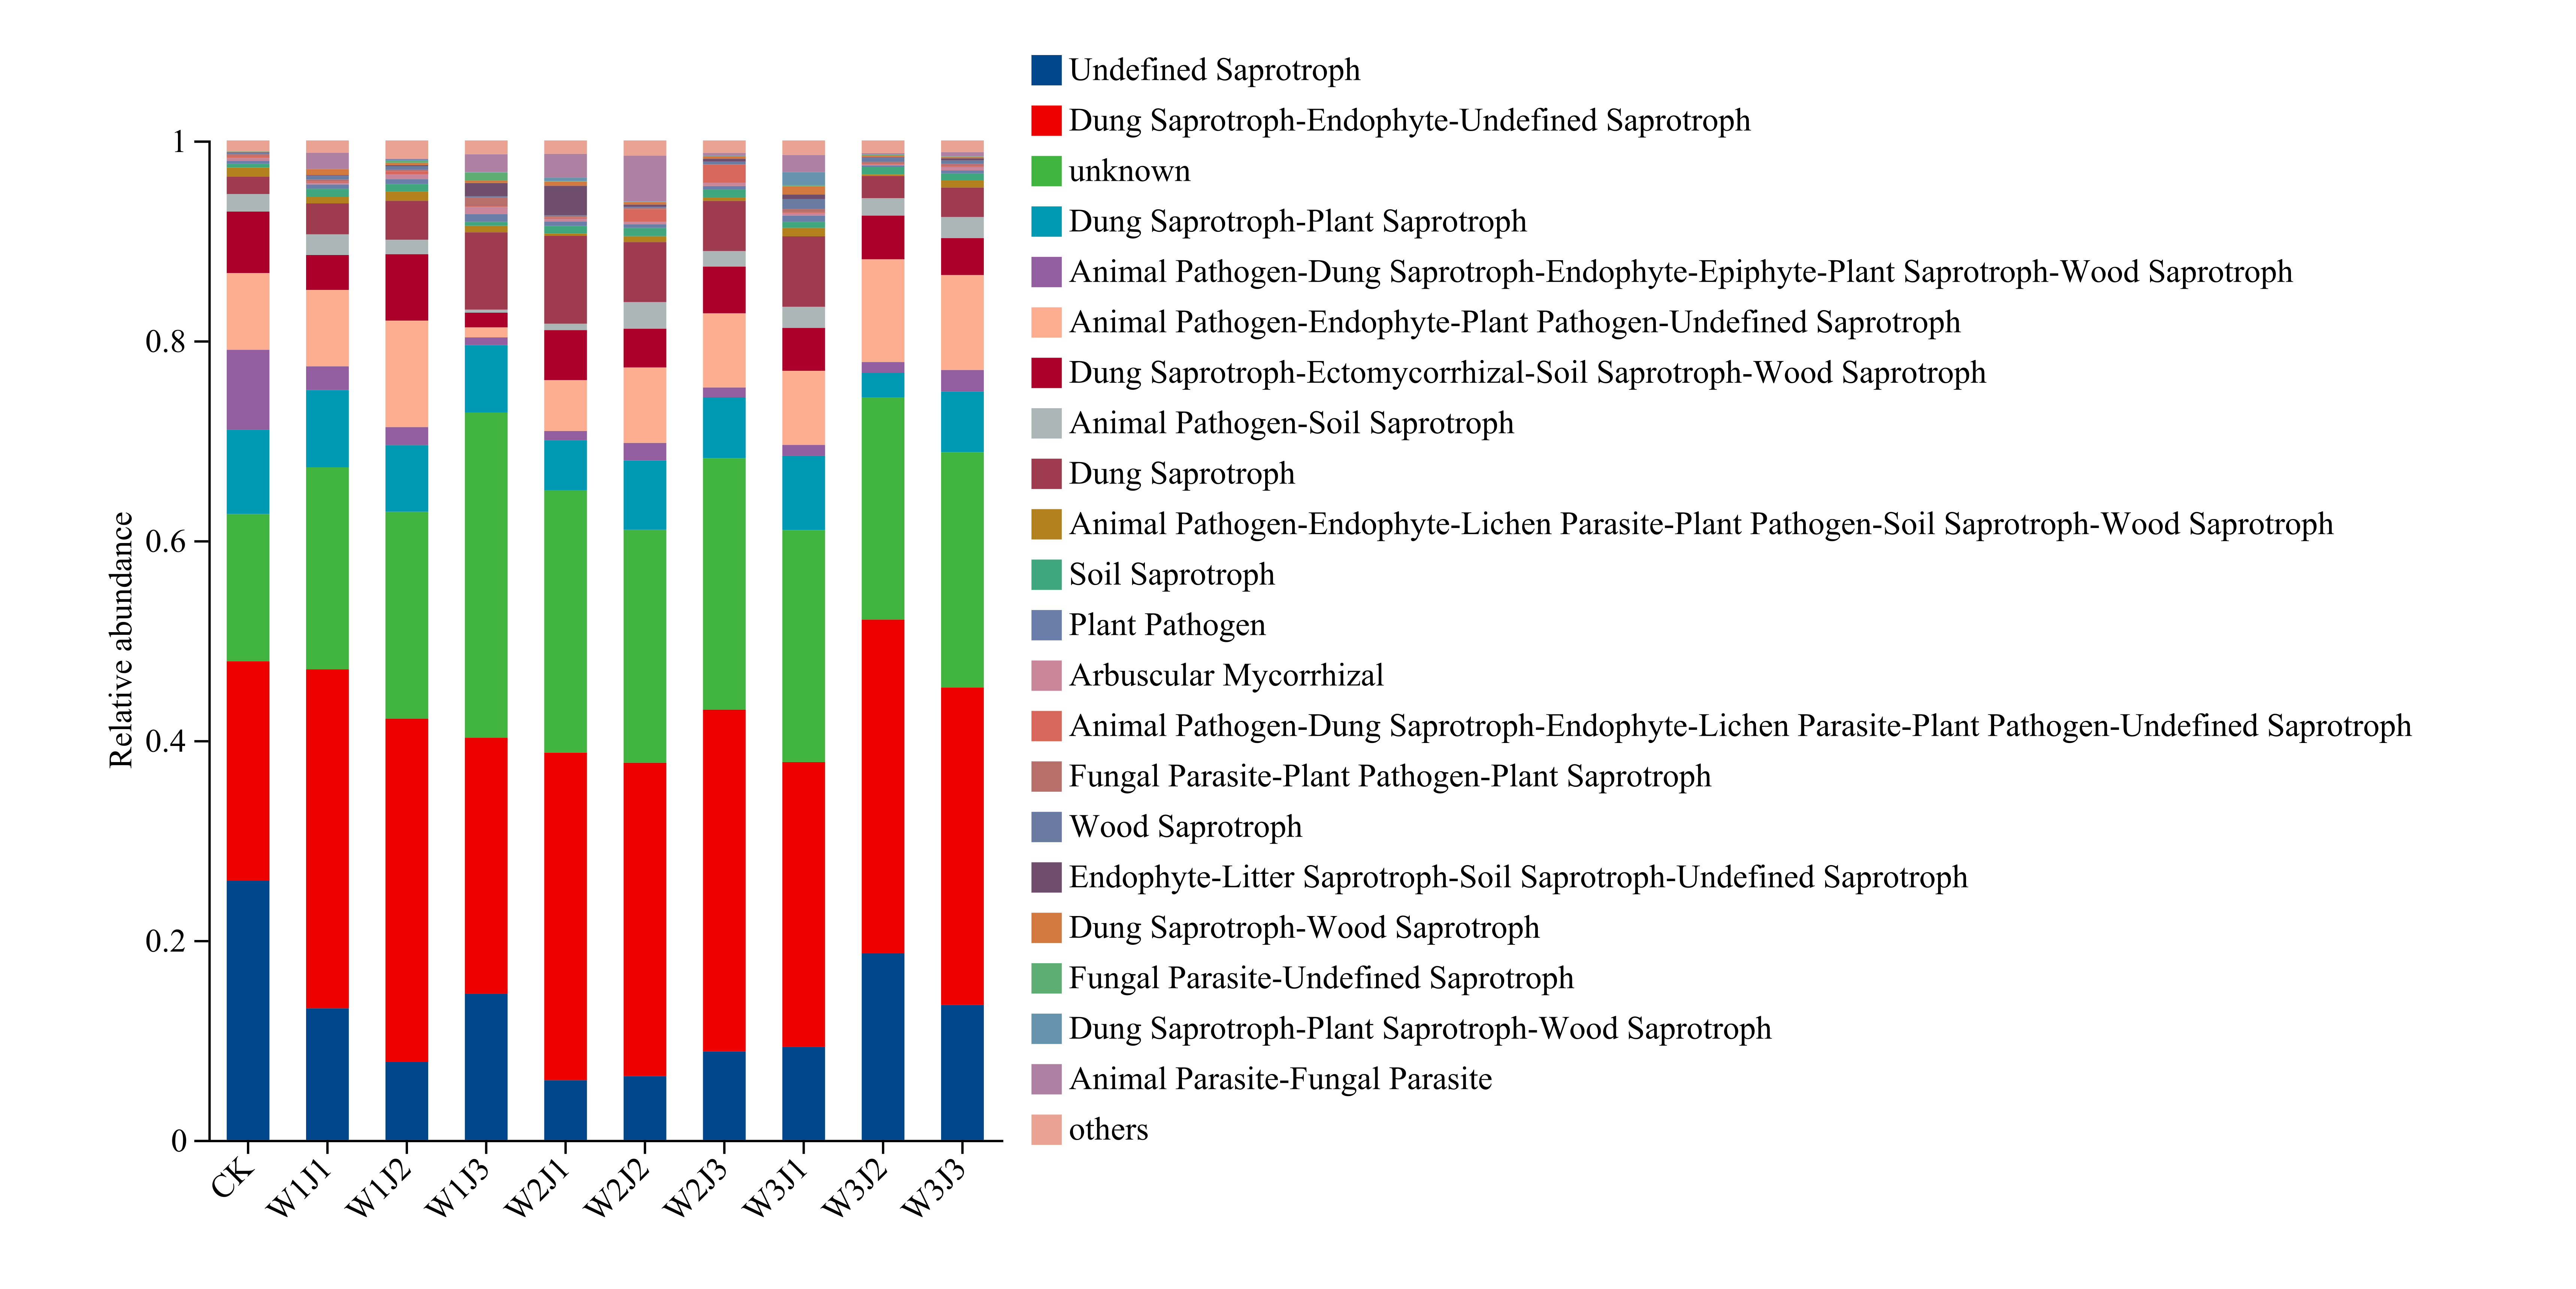


**Figure S4.** FUNGuild functional classification of soil fungal communities under different fertilization treatments.

**Note:** W represents forage-specific fertilizer level (W1: 225.00 kg·hm⁻²; W2: 300.00 kg·hm⁻²; W3: 375.00 kg·hm⁻²); J represents composite microbial inoculant level (J1: 350.00 kg·hm⁻²; J2: 500.00 kg·hm⁻²; J3: 650.00 kg·hm⁻²).
